# Supplementary material
Source: PubMed Central journal article supplement (PMC5491371)
Supplement: NIHMS839773-supplement-2.pdf [file NIHMS839773-supplement-2.pdf]

## Supplemental Figure 1

**A**

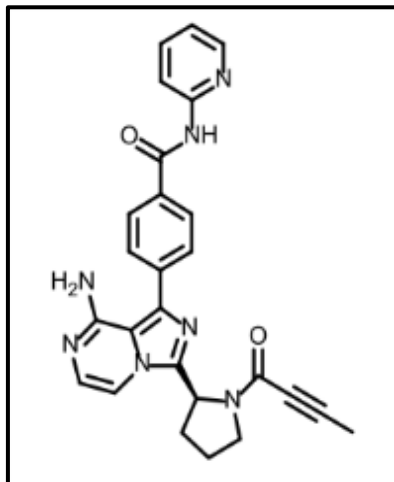

**B**

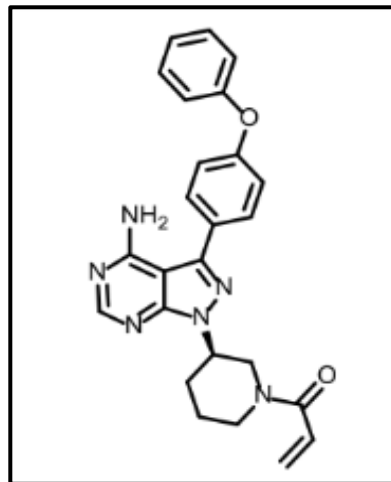

**Figure 1. Structures of acalabrutinib and ibrutinib.** **A.** Chemical structure of acalabrutinib. **B.** Chemical structure of ibrutinib.
